# 1        **Psilocybin exerts distinct effects on resting state networks** 2        **associated with serotonin and dopamine in mice**

3  
4        Joanes Grandjean<sup>a,b\*</sup>, David Buehlmann<sup>b</sup>, Michaela Buerge<sup>c</sup>, Hannes Sigris<sup>c</sup>, Erich Seifritz<sup>c,d</sup>,  
5        Franz X. Vollenweider<sup>c,d</sup>, Christopher R. Pryce<sup>c,d</sup>, Markus Rudin<sup>b,e</sup>

6  
7        a Singapore Bioimaging Consortium, Agency for Science, Technology and Research, b Institute for Biomedical  
8        Engineering, University and ETH Zurich, c Department of Psychiatry, Psychotherapy and Psychosomatics,  
9        Psychiatric Hospital, University of Zurich, d Center for Neuroscience Research, University and ETH Zurich, e Institute  
10       of Pharmacology and Toxicology, University of Zurich

11  
12  
13       Running title: Psilocybin affects resting-state networks in mice

14  
15  
16  
17       **\*Corresponding author**

18       Joanes Grandjean, PhD

19       Department of Radiology and Nuclear Medicine & Donders Institute for Brain, Cognition, and Behaviour, Donders  
20       Institute, Radboud University Medical Centre, Nijmegen 6525 EZ, The Netherlands

21       Joanes.Grandjean@radboudumc.nl

22  
23  
24  
25       Keywords: Psilocybin, functional connectivity, serotonin, dopamine, resting-state, mouse

26 **Abstract**

27 Hallucinogenic agents have been proposed as potent antidepressants; this includes the serotonin (5-HT)  
28 receptor 2A agonist psilocybin. In human subjects, psilocybin alters functional connectivity (FC) within the  
29 default-mode network (DMN), a constellation of inter-connected regions that is involved in self-reference  
30 and displays altered FC in depressive disorders. In this study we investigated the effects of psilocybin on  
31 FC in the analogue of the DMN in mouse, with a view to establishing an experimental animal model to  
32 investigate underlying mechanisms. Psilocybin effects were investigated in lightly-anaesthetized mice using  
33 resting-state fMRI. Dual-regression analysis identified reduced FC within the ventral striatum in psilocybin-  
34 relative to vehicle-treated mice. Refinement of the analysis using spatial references derived from both gene  
35 expression maps and viral tracer projection fields revealed two distinct effects of psilocybin: it increased FC  
36 between 5-HT-associated networks and elements of the murine DMN, thalamus, and midbrain; it decreased  
37 FC within dopamine (DA)-associated striatal networks. These results suggest that interaction between 5-  
38 HT- and DA-regulated neural networks contributes to the neural and therefore psychological effects of  
39 psilocybin. Furthermore, they highlight how information on molecular expression patterns and structural  
40 connectivity can assist in the interpretation of pharmaco-fMRI findings.

## 41 **Introduction**

42 Psychiatric disorders are associated with changes in the status of specific neurotransmitter systems,  
43 including those of serotonin (5-hydroxytryptamine, 5-HT) and dopamine (DA). Recently, psilocybin, a  
44 psychedelic compound derived from "magic mushrooms" with high affinity to the 5-HTA receptor (Nichols,  
45 2004; Halberstadt and Geyer, 2011), has gained in research interest due to its potential to alleviate  
46 depression and anxiety (Grob et al., 2011; Griffiths et al., 2016; Carhart-Harris et al., 2017a). Whilst the  
47 primary target of its active metabolite psilocin is the 5-HT<sub>2A</sub> receptor and it binds to a lesser extent to  
48 receptor 5-HT<sub>1A</sub>, psilocybin has also been shown to induce DA release in the nucleus accumbens in rats  
49 (Sakashita et al., 2015) and to reduce <sup>11</sup>C-raclopride binding to the D<sub>2</sub> receptor in the caudate-putamen in  
50 humans (Vollenweider et al., 1999).

51 The direct and indirect actions of psilocybin on specific monoamine neurotransmitter systems result in  
52 downstream metabolic and physiological effects on the brain. Thus, psilocybin increases global energy  
53 metabolism indicated by elevated glucose utilization rates in the frontomedial, frontolateral and anterior  
54 cingulate cortices as well as in basal ganglia (Vollenweider et al., 1997). Also, somewhat counterintuitively,  
55 reduced cerebral blood flow (CBF) in several brain regions including cingulate cortex, thalamus and  
56 striatum, has been reported (Carhart-Harris et al., 2012). In blood oxygen level-dependent functional  
57 magnetic resonance imaging (BOLD fMRI) studies, psilocybin decreased functional connectivity (FC) within  
58 the default-mode network (DMN), and between the anterior DMN and task-positive networks (Carhart-  
59 Harris et al., 2012; Carhart-Harris et al., 2013; Roseman et al., 2014). Psilocybin therefore impacts on FC  
60 in various networks throughout the human brain, with the main effect centred on the DMN. This is consistent  
61 with the concept that psilocybin's psychoactive effects are mediated by networks underlying self-referential  
62 processing (Carhart-Harris et al., 2014). The mechanisms, whereby psilocybin acts on functional activity  
63 within the DMN and other resting-state networks (RSNs), remain poorly understood, including how the 5-  
64 HT system is involved.

65 The contributions of the monoamine systems 5-HT and DA to FC are challenging to understand. The  
66 midbrain nuclei hosting 5-HT (raphe nuclei) and DA (ventral tegmental area, substantia nigra pars  
67 compacta) cell bodies are not included in canonical RSNs (Damoiseaux et al., 2006). Using BOLD fMRI,

68 correlational analysis of signal traces extracted from midbrain nuclei typically fails to capture evidence of  
69 functional coupling to distal regions. Integrating complementary information with FC analysis might  
70 overcome this limitation and reveal contributions of midbrain nuclei to FC. In mouse models, integration of  
71 whole-brain imaging with region-specific gene expression (Lein et al., 2007; Ng et al., 2009; Hawrylycz et  
72 al., 2012) and axonal projection maps (Oh et al., 2014) derived from the Allen Institute for Brain Science  
73 (AIBS) offers the opportunity to investigate the molecular neuropharmacology of psychoactive agents in  
74 spatio-temporal dimensions.

75 Here we hypothesized that i) acute psilocybin administration in mice increases FC within and between  
76 elements of the rodent DMN (Sforzini et al., 2014; Stafford et al., 2014; Gozzi and Schwarz, 2016), and  
77 ii) gene expression and axonal projection maps related to specific monoamine systems can be used to  
78 identify specific contributions of these systems to the psilocybin-induced changes in FC pattern observed.  
79 To test these hypotheses, we acquired resting-state fMRI data from mice treated with psilocybin or vehicle.  
80 Conventional data analysis did not reveal any drug-induced alterations within elements of the rodent DMN.  
81 Rather, we observed a significant decrease in striatal FC, pronounced in the ventral striatum, following  
82 psilocybin. Gene expression maps for the 5-HT<sub>2A</sub> receptor or the D<sub>2</sub> receptor, and axonal projection field  
83 maps for dorsal raphe nucleus (DRN) 5-HT neurons and ventral tegmental area (VTA) DA neurons, were  
84 used as spatial references for identifying 5-HT and DA contributions to the RSN changes induced by  
85 psilocybin. This novel iterative approach revealed psilocybin effects not evident from conventional fMRI  
86 analysis, and demonstrated that psilocybin does act on FC within the rodent DMN, albeit to a lesser extent  
87 compared to its FC effects in the ventral striatum. These findings provide new translational insights into the  
88 neuropharmacology of psilocybin.

89

## 90 **Material and methods**

### 91 *Animal preparation and psilocybin administration*

92 This study was conducted in accordance with federal guidelines and under a license from the Zürich  
93 Cantonal Veterinary Office (149/2015). A total of 50 young-adult male C57BL/6 mice (Janvier, Le Genest-  
94 St Isle, France) weighing  $25 \pm 1.2$  g were studied. Animals were maintained in standard housing with food  
95 and water available *ad libitum* and in a reversed 12:12 day/night cycle (light off: 07:00-19:00 h). Anaesthesia

96 was induced with isoflurane 3.5% in a mixture of 20% O<sub>2</sub> and 80% air. Isoflurane was reduced to 2%,  
97 animals were then intubated endotracheally and ventilated mechanically at 80 breaths/min, positioned on  
98 an MR-compatible cradle, and a cannula was positioned in the tail vein. Psilocybin was dissolved in sterile  
99 water with tartaric acid and infused i.v. during 5 min with either 1 mg/kg (n = 13) or 2 mg/kg (n = 12) or  
100 vehicle only (n = 15). These doses were chosen because they were demonstrated previously to elicit  
101 hallucinogen-specific behaviour in mice (Gonzalez-Maeso et al., 2007). In contrast, doses comparable to  
102 those used in humans failed to elicit detectable hemodynamic changes in the resting BOLD signal in rats  
103 (Carhart-Harris et al., 2012; Spain et al., 2015). Following the infusion, a bolus of medetomidine (0.05  
104 mg/kg, Domitor, medetomidine hydrochloride; Pfizer Pharmaceuticals, Sandwich, UK) together with  
105 pancuronium bromide (0.2 mg/kg, Sigma-Aldrich, Steinheim, Germany) was injected i.v. and isoflurane was  
106 reduced to 1.5%. After 5 min, isoflurane was further reduced to 0.5% and medetomidine (0.1 mg/kg/h) and  
107 pancuronium bromide (0.4 mg/kg/h) were infused during the remainder of the imaging acquisition protocol  
108 as in (Grandjean et al., 2014). Functional imaging began 20 min after completion of the psilocybin or vehicle  
109 infusion. To test for potential effects of psilocybin on cardiovascular function that would lead to confounding  
110 effects on brain FC, in a separate group of mice (n = 10) electrocardiogram recordings were made whilst  
111 otherwise applying the same protocol as for the MRI experiment. Electrocardiogram recordings were  
112 performed using 3 sets of electrodes (SA instruments Inc, Stony Brook, NY, USA) inserted into the front  
113 paws and left hind paw. All animals in the study were included in the data analysis.

114

#### 115 *Image acquisition*

116 MRI experiments were conducted using a Bruker Biospec 94/30 small animal MR system (Bruker BioSpin  
117 MRI, Ettlingen, Germany) operating at 400 MHz (9.4 T). A linearly polarized volume resonator was used for  
118 transmission, together with a four-element receiver-only cryogenic phased array coil (Bruker BioSpin AG,  
119 Fällanden, Switzerland). A multi-echo gradient-echo echo planar imaging (ME-EPI) sequence was used to  
120 acquire BOLD fMRI with: repetition time 1500 ms, echo time [11, 17, 23] ms, flip angle 60°, matrix size  
121 60x30, field of view 18.2x9 mm<sup>2</sup>, number of coronal slices 20, slice thickness 0.3 mm, slice gap 0.05 mm,  
122 800 volumes, acceleration factor 1.4, horizontal field of view saturation slice to mask the lower portion of  
123 the mouse head, and 250000 Hz bandwidth. Images were pre-processed in AFNI (AFNI\_16.1.26,

124 <https://afni.nimh.nih.gov/>), using the meica.py script (Kundu et al., 2012) to reconstruct the ME-EPI and  
125 remove non-BOLD noise contributions. Reconstructed ME-EPIs were transformed to a study EPI template  
126 in ANTS (V2.1, <http://picsl.upenn.edu/software/ants/>) using linear affine and nonlinear SyN diffeomorphic  
127 transformation (Avants et al., 2011).

128

### 129 *Experimental design and statistical analysis*

130 The complete dataset used in this study is fully available online (PROJECT\_ID: Mouse\_rest\_psilocybin,  
131 <https://openneuro.org/datasets/ds001725>)

132

133 Acquisition was carried out in two separate subsets with respect to the experimenter (JG or DB): subset 1  
134 comprised vehicle = 8, 1 mg/kg n = 6, 2 mg/kg n = 5 mice, and subset 2 comprised vehicle n = 7, 1 mg/kg  
135 n = 7, 2 mg/kg n = 7) mice. Voxel-based within-network functional connectivity analysis was carried out  
136 using a dual-regression framework (Filippini et al., 2009). Briefly, spatially delineated reference maps are  
137 used to extract an averaged BOLD time course for each scan. A general linear model was used to regress  
138 these time courses into the individual scans, to obtain parameter estimate maps indicative of network  
139 strength at every voxel for each corresponding reference map. The spatial reference maps used in the dual-  
140 regression analyses were either 17 references RSNs as determined with group independent component  
141 analysis (ICA) in (Zerbi et al., 2015), *in-situ* hybridization (ISH) gene expression maps (Lein et al., 2007),  
142 or viral tracer maps (Oh et al., 2014). To confirm the spatial distribution of the ventral striatum network,  
143 seed-based maps were obtained by extracting time courses from a selected seed region in the ventral  
144 striatum, corresponding to the peak psilocybin effect in the dual-regression analysis. The BOLD signal from  
145 the seed regressing them in a general linear model into individual scans from the vehicle group to obtain  
146 parameter estimate maps denoting FC relative to the seed region. Group-level statistical analysis was  
147 carried out with a non-parametric permutation test (5000 permutations), with parameter estimate maps from  
148 mice administered with either psilocybin 1 mg/kg or 2 mg/kg compared to vehicle, or a combined psilocybin  
149 group (1 and 2 mg/kg) compared to vehicle. The statistical correction for multiple hypothesis testing was  
150 carried out in two stages: firstly using threshold-free cluster enhancement (TFCE) and second using  
151 Bonferroni correction to account for the number of reference maps investigated. Between-network analysis

152 was carried out within the FSLNets framework using false discovery rate (FDR) correction (FMRIB Software  
153 Library v5.0, [fsl.fmrib.ox.ac.uk](http://fsl.fmrib.ox.ac.uk)). Parametric one-sample *t*-tests were carried out in the seed-based analysis.  
154 Statistical maps are shown as colour-coded *t*-statistic overlay on the AMBMC template  
155 ([www.imaging.org.au/AMBMC/AMBMC](http://www.imaging.org.au/AMBMC/AMBMC)) with a threshold set at  $p < 0.05$  (TFCE and Bonferroni corrected).  
156 Region-of-interest (ROI) analysis was performed using a parcellation based on the AIBS atlas. Statistical  
157 analysis at the ROI level was performed with a parametric linear model with contrast analysis and corrected  
158 with FDR. Descriptive statistics are given as mean  $\pm$  1 standard deviation. Estimation statistics are provided  
159 as mean differences  $\pm$  95<sup>th</sup> confidence interval estimated by bootstrap resampling  
160 (<https://www.estimationstats.com>) (Ho et al., 2019).

161  
162 AIBS database search  
163 Maps of gene expression and projection field were obtained from the AIBS database ([http://mouse.brain-  
164 map.org/](http://mouse.brain-map.org/)). ISH gene expression maps relating to genes encoding 5-HT and DA receptors were searched  
165 using “Htr” and “Drd” terms, respectively. Expression maps were selected based on the presence of  
166 detectable expression and absence of artefact in the reconstructed images. The maps from the following  
167 experiments were downloaded using the AIBS application programming interface: Htr1a 79556616, Htr1b  
168 583, Htr1f 69859867, Htr2a 81671344, Htr2c 73636098, Drd1 71307280, Drd2 81790728. Viral tracer maps  
169 were obtained by selecting AIBS experiments carried out in lines expressing the Cre recombinase in 5-HT  
170 and DA neurons for the DRN (114155190) and VTA (160539283), respectively. Maps were spatially  
171 transformed to reference space using ANTS and normalized to a [0, 100] range. Injection site and white  
172 matter fibres were masked from tracer injection maps using white matter masks. An anatomic gene  
173 expression atlas (AGEA) correlation map denoting the correlation between the gene expression profile  
174 obtained from a seed region in the ventral striatum and that of the gene expression profiles across every  
175 remaining voxel in the brain was obtained from the AIBS database. In effect, an AGEA map indicates the  
176 degree of resemblance in gene expression across the whole brain relative to a target region. The  
177 correlations were established on the basis of 4376 ISH maps previously selected for genes expressed in  
178 the brain (Lein et al., 2007). A Spearman’s rank correlation was used to compare the spatial overlap of the  
179 AGEA map to the seed-based map estimated with a seed in the ventral striatum. Additional comparisons

180 between ISH maps and the 17 references RSNs were also performed with Spearman's rank correlations.  
181 The significance of a correlation between *Drd2* or *Htr2a* gene expression maps and individual RSN maps  
182 was determined as the 95<sup>th</sup> percentile of a null distribution estimated using the remaining 4374 ISH gene  
183 expression maps (the original 4376 ISH maps minus those for *Drd2* and *Htr2a*).

184

## 185 **Results**

### 186 **Psilocybin predominantly affects functional connectivity within the ventral striatum**

187 To test for potential confounding cardiovascular-mediated effects of psilocybin on brain FC, heart rate was  
188 monitored in a separate group of mice using electrocardiogram recordings and applying the same protocol  
189 as for the MRI experiment. Heart rate was  $302 \pm 30$  beats per minute (bpm) in mice ( $n = 5$ ) that received  
190  $2 \text{ mg/kg}$  psilocybin and  $296 \pm 27$  bpm in mice ( $n = 5$ ) that received vehicle; psilocybin was without a significant  
191 effect on heart rate therefore (two-sample *t*-test,  $t = 0.32$ ,  $p$ -value = 0.75), consistent with observations in  
192 humans (Hasler et al., 2004).

193 Using the 17 RSNs established with ICA in a previous study (Zerbi et al., 2015), dual-regression analysis  
194 identified that psilocybin led to reduced FC within the ventral striatum network of approximately 37%, with  
195 the effect similar at the two psilocybin doses (Figure 1, mean difference  $1 \text{ mg/kg}$  minus Veh =  $-15.21 \pm [-21.67, -$   
196  $8.22]$ , mean difference  $2 \text{ mg/kg}$  minus Veh =  $-13.35 \pm [-20.85, -5.16]$ ). As for the ventral striatum, also for other  
197 RSNs there was no significant dose-dependent psilocybin effect, and therefore the two dose groups were  
198 pooled to enhance statistical power and the analysis run again. The psilocybin effect of reduced FC in the  
199 ventral striatum was robust and reproducible, as the two subsets revealed similar results (Figure S1).  
200 Psilocybin effects on FC were obtained within three additional RSNs, the piriform cortex, dorsal striatum  
201 and lateral striatum (Figure S2); however, these effects did not survive the second stage of statistical  
202 correction, namely Bonferroni threshold. In a network analysis, there were no significant psilocybin effects  
203 on between-network FCs for any pair of RSNs after full correction. We conclude that the striatal networks,  
204 and in particular the ventral striatum RSN, were the most responsive to psilocybin, therefore.

205



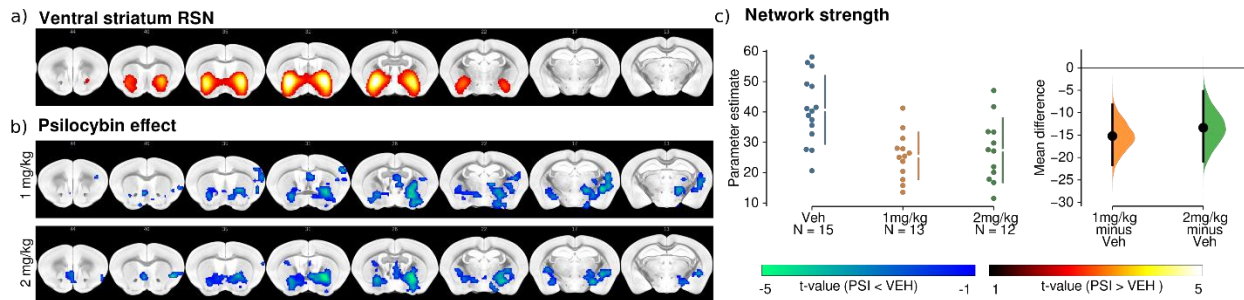

206  
207 **Figure 1** | a) Reference map for the ventral striatum RSN and (b) statistical non-parametric maps estimated  
208 with dual-regression indicating decreased FC within the striatal RSN and extending to the pallidum in the  
209 psilocybin groups (1 mg/kg, 2 mg/kg) relative to vehicle. c) Network strength extracted from the ventral  
210 striatum in the 3 groups. A comparable mean difference was found in both psilocybin groups relative to the  
211 control group. Reference RSN is shown as colour-coded overlay. Statistical non-parametric maps are  
212 shown as colour-coded t-statistics ( $p < 0.05$  corrected with TFCE and Bonferroni correction). Mean  
213 differences are plotted as bootstrap sampling distributions. Black dots indicate mean differences. Vertical  
214 error bars indicate 95<sup>th</sup> confidence intervals. Vehicle  $n = 15$ , psilocybin 1 mg/kg  $n = 13$ , psilocybin 2 mg/kg  
215  $n = 12$ .

216  
217 **Ventral striatum RSN overlaps with a gene cluster characterized by high DA receptor gene**  
218 **expression**

219 Recent work has demonstrated a tight link between resting-state fMRI RSNs and spatial patterns of gene  
220 expression (Richiardi et al., 2015). To investigate gene expression in the ventral striatum (the RSN that  
221 was most sensitive to psilocybin), the highest t-value voxel in the statistical map (Figure 1) denoting the  
222 peak location of the psilocybin effect, was used as a reference region for a seed-based analysis in the  
223 vehicle group (Figure 2). The resultant seed-based maps for ventral striatum FC were consistent with the  
224 spatial delineation of the corresponding reference RSN in the ICA atlas established for untreated mice  
225 (Zerbi et al., 2015). The gene expression profiles of 4376 genes in brain tissues were extracted from the  
226 same seed region as above, and compared to those of the remaining voxels in the brain. This determined  
227 a cluster of voxels co-expressing the same genes. The gene expression correlation map strongly  
228 overlapped with the seed-based map for these ventral striatum voxels ( $\rho = 0.356$ ,  $p < 10^{-16}$ ), indicative of  
229 a conserved topology between gene expression and intrinsic functional activity. This gene expression  
230 cluster was enriched with, among other genes, those encoding for the D1 and D2 receptors (1.75 and 2.06

231 fold increase in *Drd1* and *Drd2* expression, respectively, compared with voxels outside the cluster). This  
232 indicates that the RSN predominantly affected by psilocybin is enriched in DA receptors.  
233

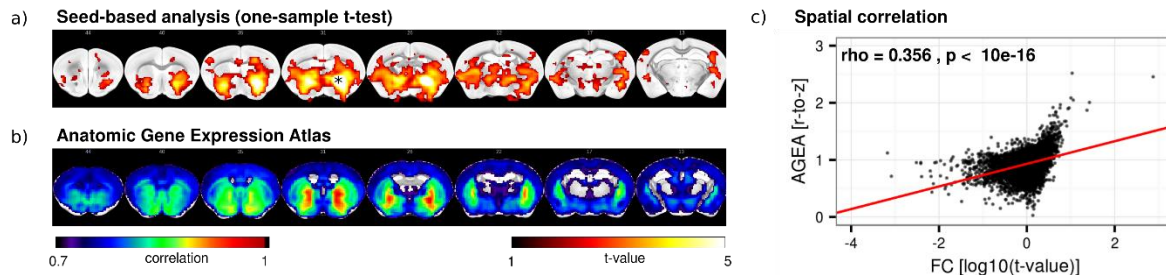

234 **Figure 2** | a) One-sample t-test maps performed in vehicle-treated mice ( $n = 15$ ) for seed-based FC maps estimated  
235 with a 2x2 voxel seed region placed in the ventral striatum (asterisk), which was found to display the highest level of  
236 significance regarding psilocybin effects (see Figure 1). FC relative to the seed co-localizes with the ventral striatum in  
237 the vehicle group. b) The gene co-expression cluster obtained from the anatomic gene expression atlas (AGEA) for the  
238 same seed indicates voxels with correlating gene expression patterns to the seed voxel. c) Its spatial extent overlaps  
239 with the FC cluster. Voxel-wise comparison across all brain voxels resulted in a strong correlation between the two  
240 maps ( $\rho=0.356$ ,  $p < 10^{-16}$ ). Seed-based FC maps are shown as t-statistics ( $p < 0.05$  uncorrected), Gene co-expression  
241 is shown as colour-coded correlation coefficient relative to the seed.  
242  
243

#### 244 **5-HT2A and D2 receptor expressions are localized in different RSNs.**

245 The previous analysis identified that the ventral striatum network overlapped with a gene co-expression  
246 cluster enriched in DA receptors. Next, the analysis was extended to investigate for inter-relationships  
247 between the remaining RSNs and the gene expression maps for 5-HT2A (*Htr2a*) and D2 (*Drd2*) receptors.  
248 D2 was selected because psilocybin decreased the binding potential of the D2 PET ligand  $^{11}\text{C}$ -raclopride  
249 indicating increased receptor occupancy by endogenous dopamine (Vollenweider et al., 1999), and 5-HT2A  
250 is the main target of psilocin (Nichols, 2004; Halberstadt and Geyer, 2011) and necessary for its  
251 hallucinogenic effects (Vollenweider et al., 1998; Gonzalez-Maeso et al., 2007). To test for spatial  
252 associations of RSNs with either *Drd2* or *Htr2a* expression, Spearman rank correlation was calculated for  
253 each of the 17 RSNs (Figure 3a) and the gene expression maps extracted from the AIBS database (Figure  
254 3b and c, Figure S3a). Significance was assessed relative to a null distribution generated from the  
255 Spearman rank correlations between each RSN and the gene expression maps for the other 4374 genes  
256 expressed in brain tissues (Figure 3d). The *Drd2* gene expression map was significantly spatially correlated  
257 with the dorsal, lateral, and ventral striatum networks ( $\rho = [0.47, 0.34, 0.41]$ ,  $p\text{-value} = [0.004, 0.008,$

258 0.001], respectively). For the *Htr2a* gene expression map, significant spatial correlations were observed  
259 with the piriform cortex, prefrontal cortex, and ventral striatum networks ( $\rho = [0.29, 0.22, 0.20]$ ,  $p$ -value =  
260  $[0.03, 0.03, 0.04]$ , respectively). We conclude that *Htr2a* and *Drd2* are expressed within these distinct RSNs.  
261 Interestingly, the ventral striatum network, presenting the strongest within-network psilocybin effect, was  
262 found to overlap with both receptor expression profiles.  
263

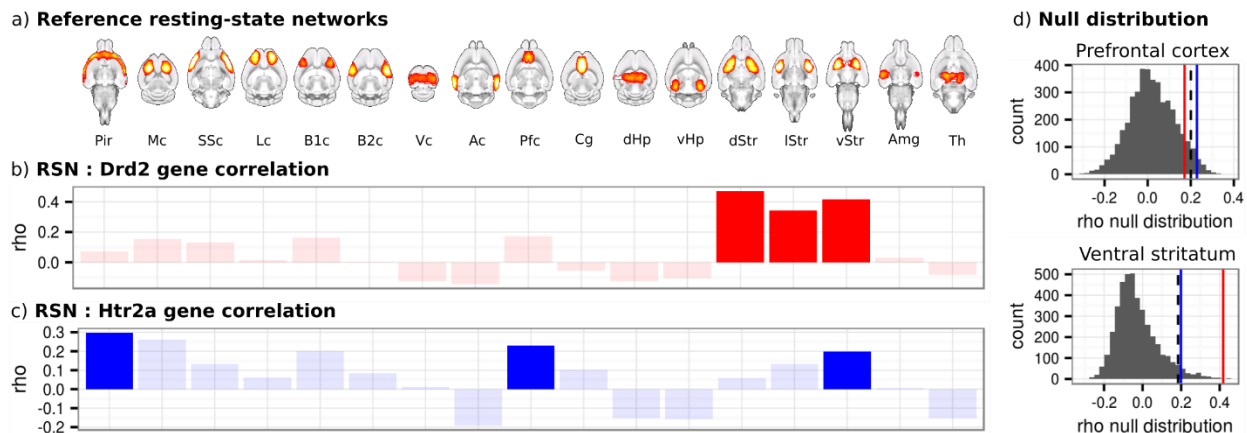

264 **Figure 3** | a) The 17 reference mouse brain RSNs b) Correlation between *Drd2* gene expression map and the RSNs  
265 indicate significant correlations for the dorsal, ventral, and lateral striatum networks (dStr, lStr, vStr). Correlations below  
266 the significance threshold are shown in light shades. c) Correlation between *Htr2a* gene expression map and the RSNs  
267 indicates significant correlations in the piriform (Pir) and prefrontal (Pfc) cortex networks and the vStr network. d) A null  
268 distribution denoting the spatial correlation between 4374 gene expression and the prefrontal cortex or ventral striatum  
269 are represented as grey histograms. These report the distribution of the correlation coefficients between the RSN spatial  
270 map and a sample of gene expression maps selected for their expression in brain tissues. The dashed lines indicate  
271 the 95<sup>th</sup> percentile of that null distribution used as a significance threshold, red lines indicate value for correlation to  
272 *Drd2* gene expression map, and blue lines to *Htr2a* gene expression map.  
273  
274

### 275 Using 5-HT and DA gene expression and projection field to increase acuity of analysis of psilocybin 276 effects on resting-state FC

277 To differentiate the effects of psilocybin on 5-HT- and DA-associated networks across the whole brain, a  
278 dual-regression analysis was carried with brain-wide *Drd2* and *Htr2a* gene expressions used as spatial  
279 reference maps (Figure 4a and b, Figure S3a). The averaged resting BOLD time series from the regions  
280 delineated in these reference maps were extracted and used to establish FC between these reference  
281 regions and the remaining voxels across the whole-brain. The dual-regression analysis revealed reduced  
282 FC between the *Drd2* expressing regions and the striatum, pallidum and thalamus in psilocybin versus

283 vehicle-treated mice, comparable to the results obtained previously (Figure 1). A weak opposite effect, i.e.  
284 increased FC due to psilocybin, was found between *Htr2a* expressing regions and the left dorsal striatum,  
285 although this effect did not survive statistical correction in the subsequent ROI analysis (Figure 4b).  
286 Analyses carried out for other 5-HT receptor gene-expression maps did not reveal significant clusters. To  
287 confirm these results, we used viral tracer maps, obtained by virus injection targeting DA neurons in the  
288 VTA or 5-HT neurons in the DRN, as spatial references in the dual-regression analysis (Figure 4c and d,  
289 Figure S3b). In agreement with the results based on gene expression levels, psilocybin induced a significant  
290 decrease in FC between the VTA projection fields and the medial and posterior subfields of the striatum. In  
291 contrast, psilocybin administration increased FC between the DRN projection fields and the dorsal striatum,  
292 retrosplenial cortex, visual cortex, thalamus and midbrain. We conclude that psilocybin administration  
293 exerts differential effects on 5-HT- and DA-associated networks; namely, it increases FC between the 5-  
294 HT system and several striatal, cortical, and thalamic regions, and decreases FC between the DA system  
295 and striatal regions. It is noteworthy that the 5-HT-related effects were not detected when applying  
296 conventional RSN analysis, i.e. examining within-network and between-network FC relative to ICA-based  
297 reference mouse RSNs. Hence, the inclusion of prior information concerning the origins and projection  
298 pathways of specific neurotransmitter systems, based on gene expression patterns and/or structural  
299 connectivity derived from viral tracer maps, can enhance the sensitivity of FC analysis.

300

## 301 **Discussion**

302 We hypothesized that psilocybin administration would decrease FC in the murine DMN-, similar to the  
303 effects observed in the human DMN (Carhart-Harris et al., 2012; Carhart-Harris et al., 2013). However, this  
304 was not apparent in the initial analysis. Instead, psilocybin reduced FC in the ventral striatum. According to  
305 gene expression maps, the RSN ventral striatum is, enriched in DA receptors and, to a lesser extent, 5-  
306 HT2A receptors. We then devised a novel analytical approach based on pre-defined projection fields  
307 derived from gene expression patterns and viral tracing maps to evaluate specific associations of 5-HT and  
308 DA-associated regions with estimated resting-state FC in the corresponding RSNs. This identified distinct  
309 effects of psilocybin on RSNs enriched in these two monoamine systems; namely, psilocybin increased FC  
310 between 5-HT-associated regions and RSNs of the mouse DMN, and decreased FC between the DA  
311 associated regions and striatal RSNs.

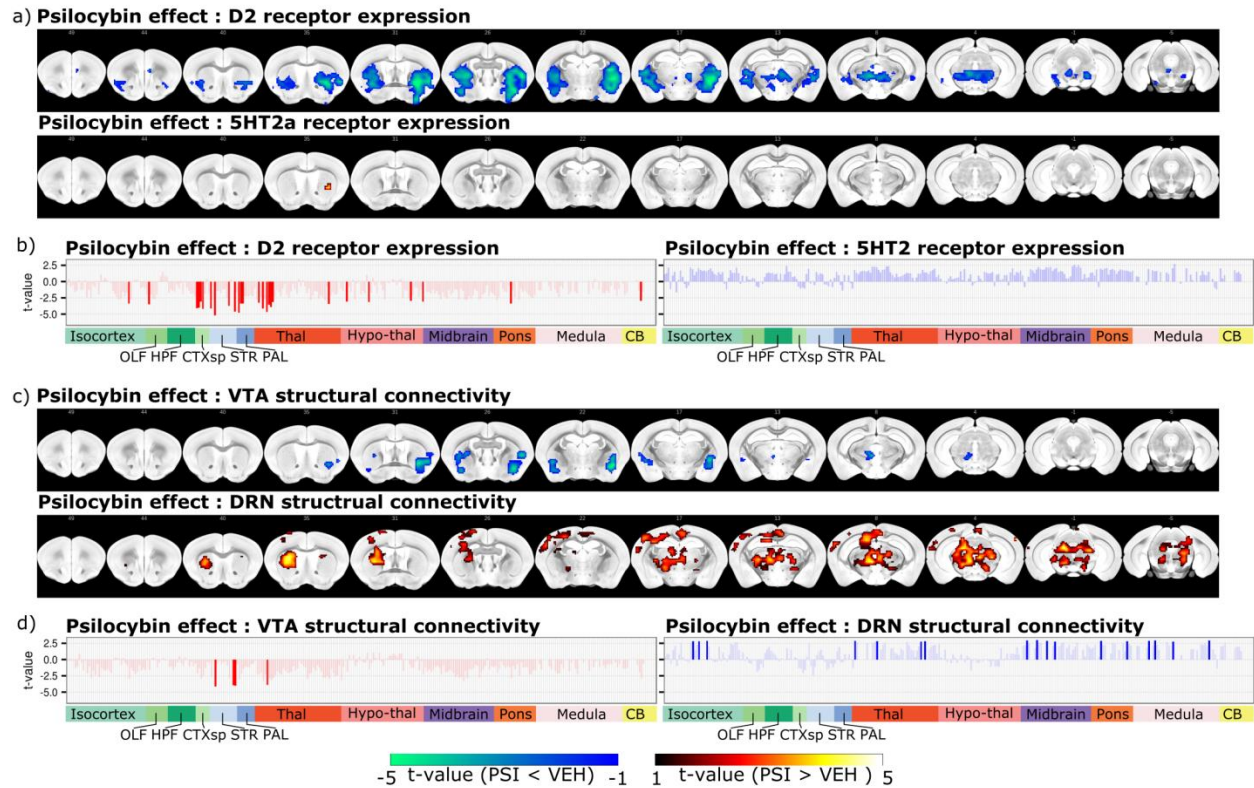

312  
 313 **Figure 4** | a) Statistical non-parametric maps showing psilocybin effect relative to vehicle for dual-regression analysis  
 314 carried out with gene expression maps as spatial references. FC was reduced between *Drd2* gene expressing regions  
 315 and in the striatum, pallidum, and thalamus in the psilocybin groups relative to vehicle. A small cluster was present in  
 316 the striatum denoting an increase in FC between *Htr2a* expressing regions and this striatum in the psilocybin groups  
 317 relative to vehicle. b) ROI analysis confirms the presence of significant effects of psilocybin in ROIs found in the striatum,  
 318 pallidum and thalamus relative to *Drd2* expressing regions, denoting decreased FC in the psilocybin mice relative to  
 319 controls. There was no significant effect relative to *Htr2a* expression regions. c) Statistical non-parametric maps  
 320 obtained using the VTA and DRN projection fields as reference maps. Reduced FC is observed between the striatum  
 321 and pallidum, and regions receiving VTA projection, in the psilocybin groups relative to vehicle. Increased FC is  
 322 observed between the dorsal striatum, retrosplenial cortex, visual cortex, thalamus, and midbrain, and regions receiving  
 323 DRN projections, in the psilocybin groups relative to vehicle. d) ROI analysis confirms the presence of significant effects  
 324 relative to VTA and DRN projection fields. Statistical non-parametric maps are shown as colour-coded t-statistics  
 325 ( $p < 0.05$  corrected with FDR and Bonferroni correction). Bar plots indicate t-statistics for parameter estimate  
 326 comparisons extracted using AIBS Atlas ROIs. Values below the significance threshold (FDR corrected) are shown in  
 327 light shades. Colour labels indicate ontological structures: OLF=Olfactory areas, HPF=Hippocampal formation,  
 328 CTXsp=Cortical sub-plate, STR=Striatum, PAL=Pallidum, Thal=Thalamus, Hypo-thal=Hypothalamus, CB=Cerebellum.  
 329 Reference spatial maps used to delineate *Drd2*- and *Htr2a*-expressing regions, as well as VTA and DRN projections  
 330 are indicated in **Figure S3**.  
 331

332 The DMN is considered to be one of the most important systems underlying higher cognitive functions  
 333 (Raichle et al., 2001), and within- and between-region FC is increased in depression (Sheline et al., 2010)



334 and animal models thereof (Grandjean et al., 2016). In human volunteers receiving either psilocybin or  
335 placebo, Carhart-Harris and colleagues reported psilocybin-induced: reduction of FC between the DMN  
336 regions prefrontal cortex and posterior cingulate cortex (Carhart-Harris et al., 2012); increase in FC between  
337 the DMN and task-positive networks (Carhart-Harris et al., 2013); and a general increase in between-  
338 networks FC (Roseman et al., 2014). In patients with treatment-resistant depression, psilocybin was shown  
339 to normalize DMN activity (Carhart-Harris et al., 2017b). These studies indicate that the DMN is the main  
340 target for psilocybin-mediated effects. In mice, by contrast, psilocybin effects on the DMN RSNs were minor  
341 compared to the effects on the ventral striatum. This apparent discrepancy could be in part due to species-  
342 specific differences in psilocybin pharmacology and methodologies. Firstly, in a rat study, Spain et al. (2015)  
343 estimated that a dose of 0.03 mg/kg psilocin, psilocybin's active metabolite, corresponds to the 2 mg  
344 psilocybin dose administered in the human studies carried by Carhart-Harris and colleagues (Spain et al.,  
345 2015). However, they did not observe a drug-induced change in the BOLD signal at this dose. In a pilot  
346 study using 0.5 mg/kg psilocybin in mice, we only detected weak effects on mouse striatal RSN FC  
347 recapitulating the results presented above (Figure S4). At a higher psilocin dose of 2 mg/kg, Spain et al.  
348 observed reduced BOLD signal relative to baseline in the cingulate and retrosplenial cortical regions and  
349 increased BOLD signal in the amygdala and hypothalamus (Spain et al., 2015). Our present findings agree  
350 in part with these: we observed increased FC between regions expressing *Htr2a* and the cingulate and  
351 retrosplenial cortices; however, we did not observe effects within the amygdala or hypothalamus. Both of  
352 these latter regions are located ventrally in the brain and are therefore susceptible to exposure to magnetic  
353 susceptibility gradients leading to geometric distortion and BOLD signal loss (intravoxel dephasing). This  
354 can render signal detection somewhat variable in these regions and may account for the discrepancies.  
355 Second, in contrast to human studies, the rodent fMRI studies conducted with psilocybin to-date have used  
356 anaesthesia. Even though light anaesthesia was used here, interaction with the action of psilocybin cannot  
357 be excluded. This could be particularly the case for higher-order cortical networks, such as the mouse  
358 analogue of the DMN, which reportedly are affected by under light anaesthesia (Deshpande et al., 2010;  
359 Liu et al., 2015).

360

361 Psilocin, the active metabolite of psilocybin, is a 5-HT analogue and has been shown to bind to 5-HT<sub>2A</sub>  
362 and 5-HT<sub>1A</sub> receptors, and with lesser affinity to other 5-HT receptors (Nichols, 2004; Halberstadt and  
363 Geyer, 2011). The expression of 5-HT<sub>2A</sub> receptors on pyramidal glutamate neurons in the cortex was  
364 demonstrated as necessary and sufficient for induction of hallucinogen-specific behavioural responses  
365 (head twitch, ear scratch) in mice following i.v. administration of 5-HT<sub>2A</sub> agonists including psilocybin  
366 (Gonzalez-Maeso et al., 2007). In human, psilocybin effects on the DA system have been demonstrated by  
367 PET study: psilocybin led to decreased D<sub>2</sub> receptor occupancy by <sup>11</sup>C-raclopride, consistent with an  
368 increase in endogenous dopamine, in the dorsal striatum (Vollenweider et al., 1999). Using microdialysis,  
369 psilocin was shown to increase DA release in the ventral striatum of rats, whereas 5-HT release in this  
370 region was not affected. However, psilocybin did increase 5-HT release in the prefrontal cortex (Sakashita  
371 et al., 2015). These observations are in line with the psilocybin-induced reduced FC within DA-associated  
372 regions observed in our study and suggest a potential mechanism for the reduced FC within the striatum,  
373 namely increased DA release in this region. Importantly, the analysis framework developed in this study,  
374 using either structural projections or gene expression data concurrently with fMRI analyses, may allow for  
375 the overcoming of apparent limitations imposed by the generic physiological nature of the resting-state  
376 BOLD signal. Associating distinct FC patterns to either gene expression or structural connectivity priors  
377 facilitates the identification of receptor-specific or nucleus-specific contributions to FC. These analytical  
378 methods are complementary to those that apply optogenetics or chemogenetics to regulate monoamine  
379 release and study effects thereon of brain-wide hemodynamic responses (Giorgi et al., 2017; Grandjean et  
380 al., 2019).

381  
382 We are aware of potential limitations associated with our approach. Firstly, psilocin administration has been  
383 associated with decoupling between the hemodynamic response and neuronal activity in rats during short-  
384 duration, high frequency (>10 Hz) whisker sensory stimulation (Spain et al., 2015); however, this was not  
385 the case for lower frequency paradigms. Moreover, this effect would not be expected to be confined to  
386 specific RSNs, hence the relevance of this observation in the context of resting-state FC remains moot.  
387 Second, database resources of gene expression or viral tracer maps differ in map coverage and quality.  
388 Image artefact or misregistration could impact the analysis when used as priors. For instance, only a subset

389 of the 5-HT gene expression maps available on the AIBS database met our quality assurance criterion,  
390 restricting the scope of our analysis to this subset of 5-HT genes. Finally, we have used a relatively high  
391 dose of psilocybin compared to studies in humans (Carhart-Harris et al., 2012). Species-specific  
392 pharmacokinetic and pharmacodynamic properties may account for the large difference in drug dose  
393 required to elicit pharmacological responses in humans and rodents.

394

395 In conclusion, we have demonstrated robust effects of psilocybin on FC within the striatal RSNs.  
396 Incorporation of neurotransmitter-specific gene expression and viral tracer maps into our analysis enabled  
397 further refinement. In particular, we found differential psilocybin effects in 5-HT versus DA associated  
398 networks: increased FC in elements of the rodent DMN, thalamus, and midbrain attributed to 5-HT versus  
399 decreased FC in the striatum, a DA projection area rich in D2 receptors. While the implication of DMN  
400 nodes in our analysis supports our original hypothesis, this effect was comparatively small in comparison  
401 to the effect on FC within the ventral striatum. Finally, we demonstrate the application of a novel analytical  
402 approach to refine the interpretation of FC changes in RSNs. Including information on gene expression and  
403 viral tracer maps, available from large neuroscience databases, in the analysis of neuroimaging data, allows  
404 for the annotation of FC data with a molecular signature, and thereby provides mechanistic insight into  
405 factors involved in normal and pathological network functioning.

406



407 **Funding and disclosure**

408 This research was supported by a fellowship grant for JG from the Swiss Foundation for Excellence and  
409 Talent in Biomedical Research (to CRP and MR), and by project grants 31003A-141137 (to CRP and ES)  
410 and 310030-160310 (to MR) from the Swiss National Science Foundation. The authors have no financial  
411 disclosure to declare.

412

413 **References**

- 414 Avants BB, Tustison NJ, Song G, Cook PA, Klein A, Gee JC (2011) A reproducible evaluation of  
415 ANTs similarity metric performance in brain image registration. *Neuroimage* 54:2033-  
416 2044.
- 417 Carhart-Harris RL, Leech R, Hellyer PJ, Shanahan M, Feilding A, Tagliazucchi E, Chialvo DR,  
418 Nutt D (2014) The entropic brain: a theory of conscious states informed by neuroimaging  
419 research with psychedelic drugs. *Front Hum Neurosci* 8:20.
- 420 Carhart-Harris RL, Leech R, Erritzoe D, Williams TM, Stone JM, Evans J, Sharp DJ, Feilding A,  
421 Wise RG, Nutt DJ (2013) Functional connectivity measures after psilocybin inform a  
422 novel hypothesis of early psychosis. *Schizophr Bull* 39:1343-1351.
- 423 Carhart-Harris RL, Roseman L, Bolstridge M, Demetriou L, Pannekoek JN, Wall MB, Tanner M,  
424 Kaelen M, McGonigle J, Murphy K, Leech R, Curran HV, Nutt DJ (2017a) Psilocybin for  
425 treatment-resistant depression: fMRI-measured brain mechanisms. *Sci Rep* 7:13187.
- 426 Carhart-Harris RL, Roseman L, Bolstridge M, Demetriou L, Pannekoek JN, Wall MB, Tanner M,  
427 Kaelen M, McGonigle J, Murphy K, Leech R, Curran HV, Nutt DJ (2017b) Psilocybin for  
428 treatment-resistant depression: fMRI-measured brain mechanisms. *Scientific Reports*  
429 7:13187.
- 430 Carhart-Harris RL, Erritzoe D, Williams T, Stone JM, Reed LJ, Colasanti A, Tyacke RJ, Leech  
431 R, Malizia AL, Murphy K, Hobden P, Evans J, Feilding A, Wise RG, Nutt DJ (2012)  
432 Neural correlates of the psychedelic state as determined by fMRI studies with psilocybin.  
433 *Proc Natl Acad Sci U S A* 109:2138-2143.
- 434 Damoiseaux JS, Rombouts SA, Barkhof F, Scheltens P, Stam CJ, Smith SM, Beckmann CF  
435 (2006) Consistent resting-state networks across healthy subjects. *Proc Natl Acad Sci U*  
436 *S A* 103:13848-13853.
- 437 Deshpande G, Kerssens C, Sebel PS, Hu X (2010) Altered local coherence in the default mode  
438 network due to sevoflurane anesthesia. *Brain Res* 1318:110-121.
- 439 Filippini N, MacIntosh BJ, Hough MG, Goodwin GM, Frisoni GB, Smith SM, Matthews PM,  
440 Beckmann CF, Mackay CE (2009) Distinct patterns of brain activity in young carriers of  
441 the APOE-epsilon4 allele. *Proc Natl Acad Sci U S A* 106:7209-7214.
- 442 Giorgi A, Migliarini S, Galbusera A, Maddaloni G, Mereu M, Margiani G, Gritti M, Landi S,  
443 Trovato F, Bertozzi SM, Armirotti A, Ratto GM, De Luca MA, Tonini R, Gozzi A,  
444 Pasqualetti M (2017) Brain-wide Mapping of Endogenous Serotonergic Transmission via  
445 Chemogenetic fMRI. *Cell Rep* 21:910-918.
- 446 Gonzalez-Maeso J, Weisstaub NV, Zhou M, Chan P, Ivic L, Ang R, Lira A, Bradley-Moore M,  
447 Ge Y, Zhou Q, Sealfon SC, Gingrich JA (2007) Hallucinogens recruit specific cortical 5-  
448 HT(2A) receptor-mediated signaling pathways to affect behavior. *Neuron* 53:439-452.
- 449 Gozzi A, Schwarz AJ (2016) Large-scale functional connectivity networks in the rodent brain.  
450 *Neuroimage* 127:496-509.
- 451 Grandjean J, Schroeter A, Batata I, Rudin M (2014) Optimization of anesthesia protocol for  
452 resting-state fMRI in mice based on differential effects of anesthetics on functional  
453 connectivity patterns. *Neuroimage* 102 Pt 2:838-847.

- 454 Grandjean J, Azzinnari D, Seuwen A, Sigrist H, Seifritz E, Pryce CR, Rudin M (2016) Chronic  
455 psychosocial stress in mice leads to changes in brain functional connectivity and  
456 metabolite levels comparable to human depression. *Neuroimage* 142:544-552.
- 457 Grandjean J, Corcoba A, Kahn MC, Upton AL, Deneris ES, Seifritz E, Helmchen F, Mann EO,  
458 Rudin M, Saab BJ (2019) A brain-wide functional map of the serotonergic responses to  
459 acute stress and fluoxetine. *Nat Commun* 10:350.
- 460 Griffiths RR, Johnson MW, Carducci MA, Umbricht A, Richards WA, Richards BD, Cosimano  
461 MP, Klinedinst MA (2016) Psilocybin produces substantial and sustained decreases in  
462 depression and anxiety in patients with life-threatening cancer: A randomized double-  
463 blind trial. *J Psychopharmacol* 30:1181-1197.
- 464 Grob CS, Danforth AL, Chopra GS, Hagerty M, McKay CR, Halberstadt AL, Greer GR (2011)  
465 Pilot study of psilocybin treatment for anxiety in patients with advanced-stage cancer.  
466 *Arch Gen Psychiatry* 68:71-78.
- 467 Halberstadt AL, Geyer MA (2011) Multiple receptors contribute to the behavioral effects of  
468 indoleamine hallucinogens. *Neuropharmacology* 61:364-381.
- 469 Hasler F, Grimberg U, Benz MA, Huber T, Vollenweider FX (2004) Acute psychological and  
470 physiological effects of psilocybin in healthy humans: a double-blind, placebo-controlled  
471 dose-effect study. *Psychopharmacology (Berl)* 172:145-156.
- 472 Hawrylycz MJ et al. (2012) An anatomically comprehensive atlas of the adult human brain  
473 transcriptome. *Nature* 489:391-399.
- 474 Ho J, Tumkaya T, Aryal S, Choi H, Claridge-Chang A (2019) Moving beyond P values: data  
475 analysis with estimation graphics. *Nat Methods* 16:565-566.
- 476 Kundu P, Inati SJ, Evans JW, Luh WM, Bandettini PA (2012) Differentiating BOLD and non-  
477 BOLD signals in fMRI time series using multi-echo EPI. *Neuroimage* 60:1759-1770.
- 478 Lein ES et al. (2007) Genome-wide atlas of gene expression in the adult mouse brain. *Nature*  
479 445:168-176.
- 480 Liu X, Li H, Luo F, Zhang L, Han R, Wang B (2015) Variation of the default mode network with  
481 altered alertness levels induced by propofol. *Neuropsychiatr Dis Treat* 11:2573-2581.
- 482 Ng L, Bernard A, Lau C, Overly CC, Dong HW, Kuan C, Pathak S, Sunkin SM, Dang C, Bohland  
483 JW, Bokil H, Mitra PP, Puellas L, Hohmann J, Anderson DJ, Lein ES, Jones AR,  
484 Hawrylycz M (2009) An anatomic gene expression atlas of the adult mouse brain. *Nat*  
485 *Neurosci* 12:356-362.
- 486 Nichols DE (2004) Hallucinogens. *Pharmacol Ther* 101:131-181.
- 487 Oh SW et al. (2014) A mesoscale connectome of the mouse brain. *Nature* 508:207-214.
- 488 Raichle ME, MacLeod AM, Snyder AZ, Powers WJ, Gusnard DA, Shulman GL (2001) A default  
489 mode of brain function. *Proc Natl Acad Sci U S A* 98:676-682.
- 490 Richiardi J et al. (2015) BRAIN NETWORKS. Correlated gene expression supports  
491 synchronous activity in brain networks. *Science* 348:1241-1244.
- 492 Roseman L, Leech R, Feilding A, Nutt DJ, Carhart-Harris RL (2014) The effects of psilocybin  
493 and MDMA on between-network resting state functional connectivity in healthy  
494 volunteers. *Front Hum Neurosci* 8:204.
- 495 Sakashita Y, Abe K, Katagiri N, Kambe T, Saitoh T, Utsunomiya I, Horiguchi Y, Taguchi K  
496 (2015) Effect of psilocin on extracellular dopamine and serotonin levels in the  
497 mesoaccumbens and mesocortical pathway in awake rats. *Biol Pharm Bull* 38:134-138.
- 498 Sforzini F, Schwarz AJ, Galbusera A, Bifone A, Gozzi A (2014) Distributed BOLD and CBV-  
499 weighted resting-state networks in the mouse brain. *Neuroimage* 87:403-415.
- 500 Sheline YI, Price JL, Yan Z, Mintun MA (2010) Resting-state functional MRI in depression  
501 unmasks increased connectivity between networks via the dorsal nexus. *Proc Natl Acad*  
502 *Sci U S A* 107:11020-11025.

- 503 Spain A, Howarth C, Khrapitchev AA, Sharp T, Sibson NR, Martin C (2015) Neurovascular and  
504 neuroimaging effects of the hallucinogenic serotonin receptor agonist psilocin in the rat  
505 brain. *Neuropharmacology* 99:210-220.
- 506 Stafford JM, Jarrett BR, Miranda-Dominguez O, Mills BD, Cain N, Mihalas S, Lahvis GP, Lattal  
507 KM, Mitchell SH, David SV, Fryer JD, Nigg JT, Fair DA (2014) Large-scale topology and  
508 the default mode network in the mouse connectome. *Proc Natl Acad Sci U S A*  
509 111:18745-18750.
- 510 Vollenweider FX, Vontobel P, Hell D, Leenders KL (1999) 5-HT modulation of dopamine release  
511 in basal ganglia in psilocybin-induced psychosis in man--a PET study with  
512 [<sup>11</sup>C]raclopride. *Neuropsychopharmacology* 20:424-433.
- 513 Vollenweider FX, Vollenweider-Scherpenhuyzen MF, Babler A, Vogel H, Hell D (1998)  
514 Psilocybin induces schizophrenia-like psychosis in humans via a serotonin-2 agonist  
515 action. *Neuroreport* 9:3897-3902.
- 516 Vollenweider FX, Leenders KL, Scharfetter C, Maguire P, Stadelmann O, Angst J (1997)  
517 Positron emission tomography and fluorodeoxyglucose studies of metabolic  
518 hyperfrontality and psychopathology in the psilocybin model of psychosis.  
519 *Neuropsychopharmacology* 16:357-372.
- 520 Zerbi V, Grandjean J, Rudin M, Wenderoth N (2015) Mapping the mouse brain with rs-fMRI: An  
521 optimized pipeline for functional network identification. *Neuroimage* 123:11-21.  
522
